# Supplementary material for: The effect of global transcriptional regulators on the anaerobic fermentative metabolism of Escherichia coli
Source: Royal Society of Chemistry journal article supplement (doi:10.1039/c6mb00721j), 2017-05-19
Supplement: c6mb00721j1.pdf [file c6mb00721j1.pdf]

## Molecular Biosystems

### Effect of Global Transcriptional Regulators on anaerobic fermentative metabolism of *Escherichia coli*

Manika Kargeti<sup>a</sup> and K.V.Venkatesh<sup>\*</sup>

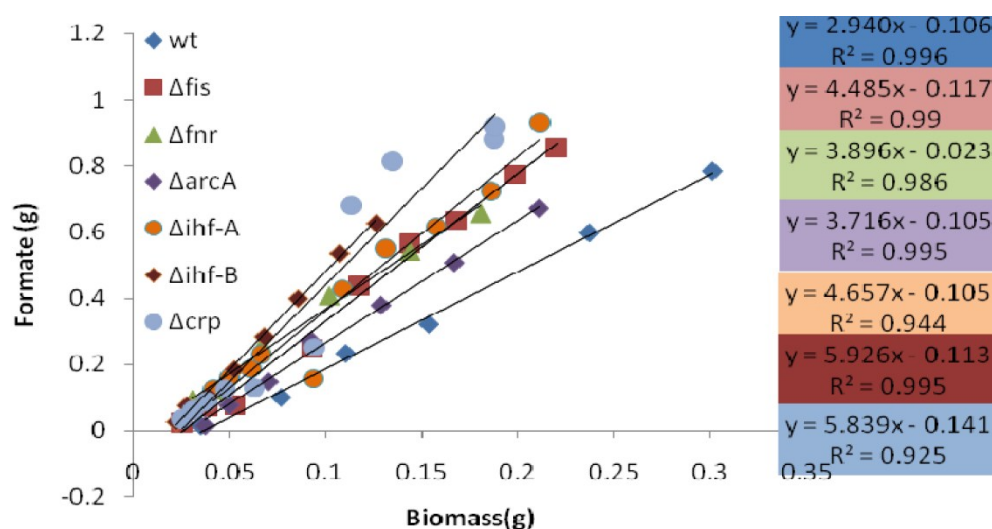

**Figure S1: Slopes of concentration of formate versus biomass concentration for WT,  $\Delta fis$ ,  $\Delta fnr$ ,  $\Delta arcA$ ,  $\Delta ihfA$ ,  $\Delta ihfB$  and  $\Delta crp$ . Note that, the value of this slope gives the yield of formate per biomass,  $Y_{g(formate)|g(biomass)}$ .**

Figure S1 shows the linear relationship between formate concentration and biomass, indicating that formate is a growth associated product. The value of the slope is different for the strains, indicating different carbon distribution for each strain.

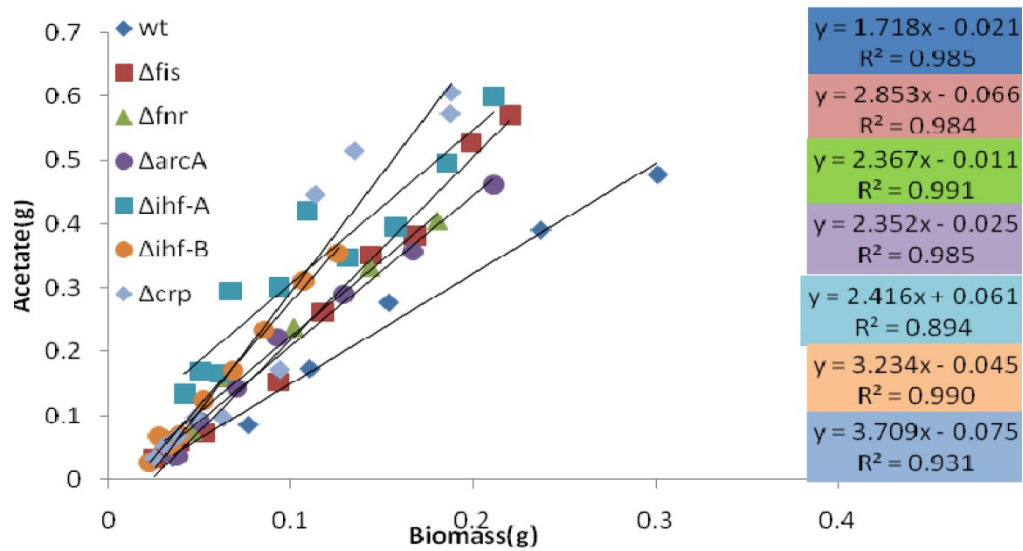

**Figure S2: Slopes of concentration of acetate versus biomass concentration WT,  $\Delta fis$ ,  $\Delta fnr$ ,  $\Delta arcA$ ,  $\Delta ihfA$ ,  $\Delta ihfB$  and  $\Delta crp$ . Note that, the value of this slope is the yield of acetate per biomass,  $Y_{g(acetate|g(biomass))}$ .**

Figure S2 shows that acetate concentration has a linear relationship with biomass, indicating that acetate is a growth associated product. The slope for all the strains is different from each other, indicating different carbon distribution towards acetate for each strain.

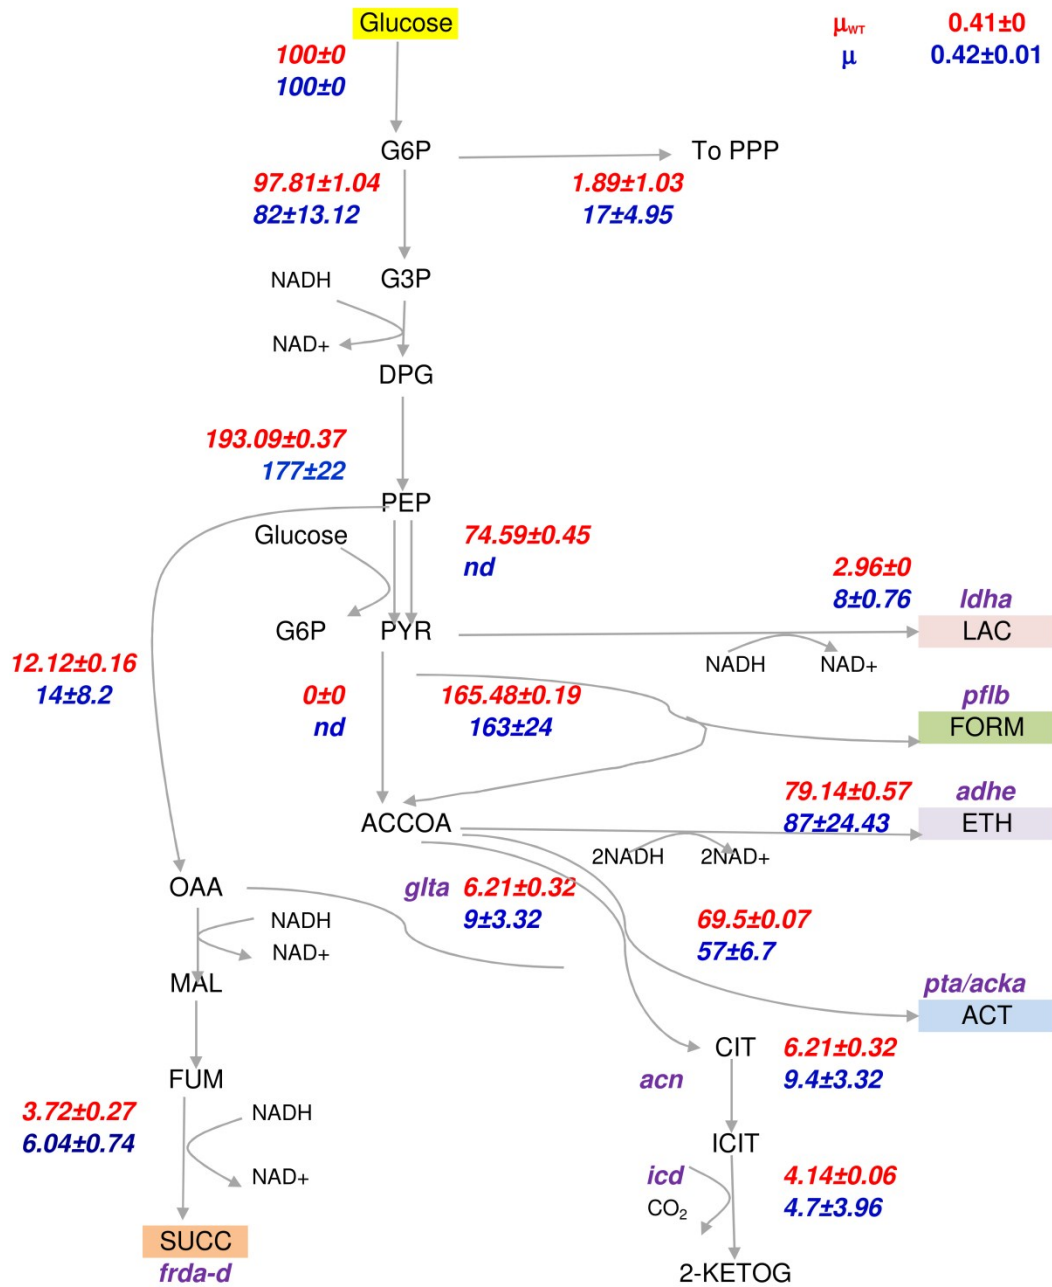

Figure S3: Flux distribution in the central carbon metabolism in the WT strain under anaerobic fermentation conditions. Note that the fluxes are normalized with glucose uptake rate (16.95 mM/g(dcw)\*h). The flux values on the top are from current study and the bottom are as reported by 13-C study in Chen *et al.*<sup>22</sup> Chen *et al.*, have reported the glucose uptake rate to be (14.9 mM/g(dcw)\*h) . The mixed acids are abbreviated as LAC for lactate, FORM for formate, ACT for acetate, ETH for ethanol and SUCC for succinate

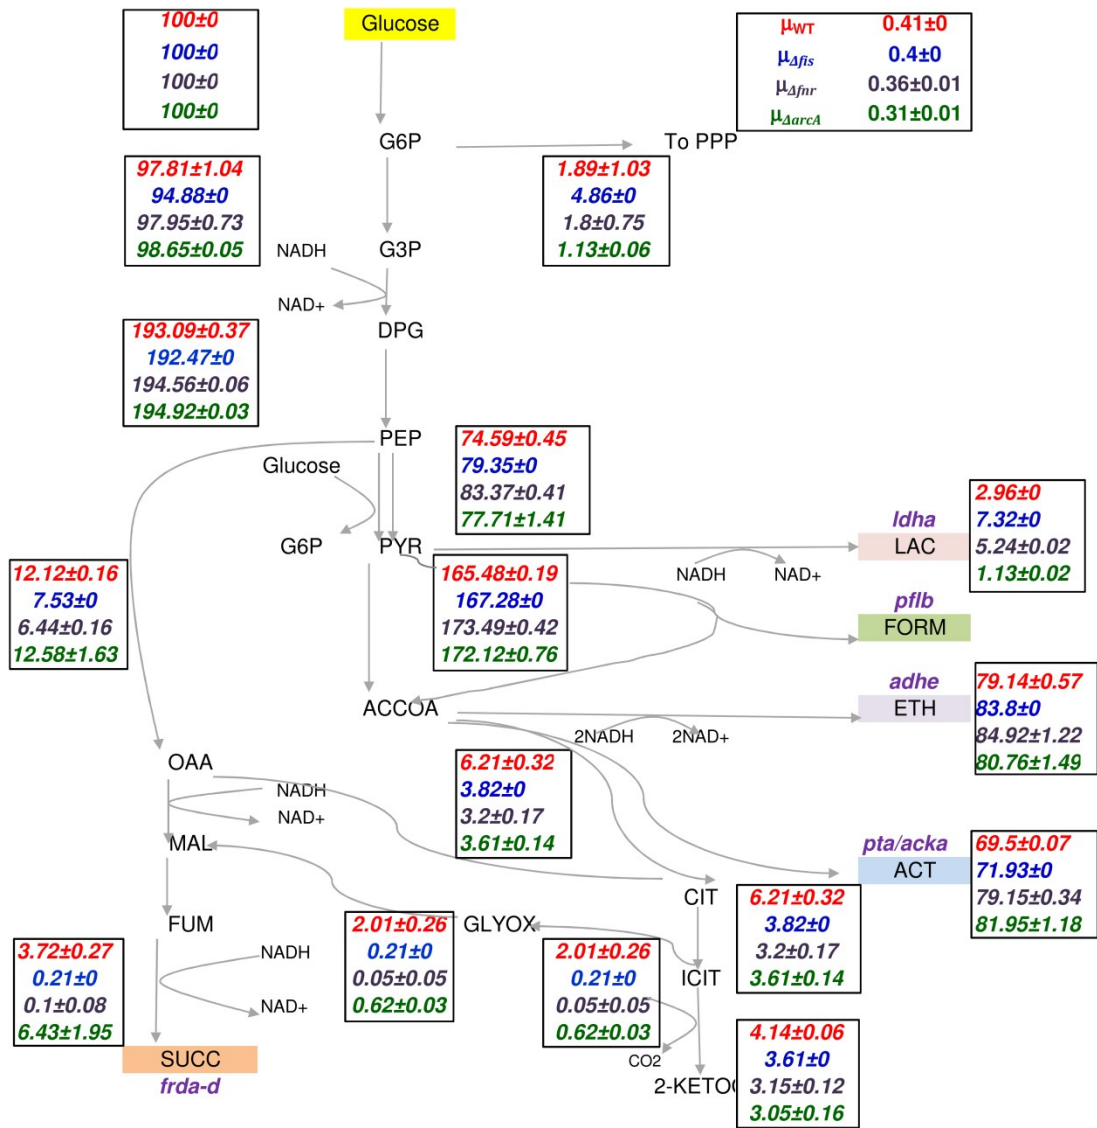

Figure S4 : Flux distribution in the central carbon metabolism in the WT,  $\Delta fis$ ,  $\Delta fnr$ , and  $\Delta arca$  strain under anaerobic fermentation conditions, from top to bottom. Note that the fluxes are normalized with respective glucose uptake rate for each strain. The mixed acids are abbreviated as LAC for lactate, FORM for formate, ACT for acetate, ETH for ethanol and SUCC for succinate.

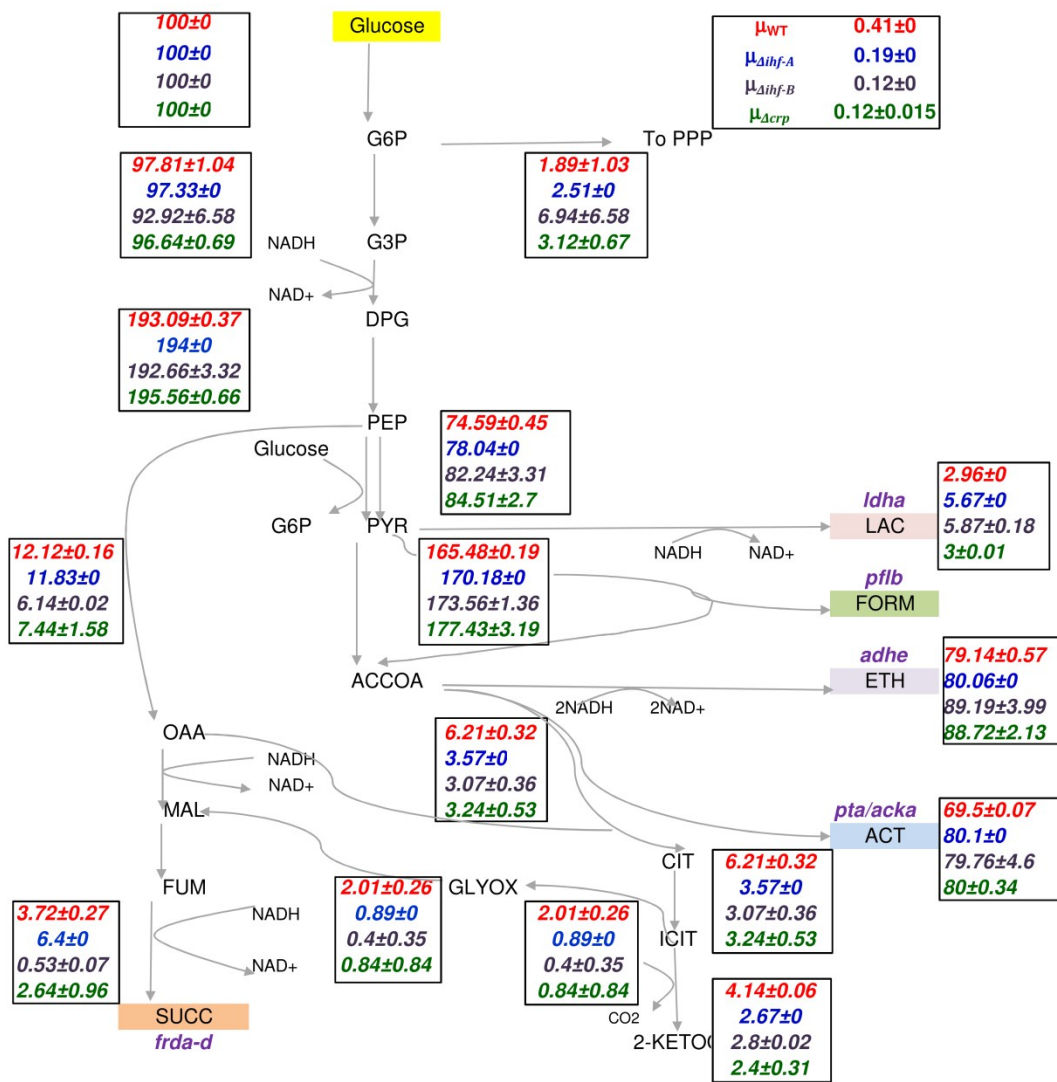

Figure S5 : Flux distribution in the central carbon metabolism in the WT,  $\Delta ihf-A$ ,  $\Delta ihf-B$   $\Delta crp$  strain under anaerobic fermentation conditions, from top to bottom. Note that the fluxes are normalized with respective glucose uptake rate for each strain. The mixed acids are abbreviated as LAC for lactate, FORM for formate, ACT for acetate, ETH for ethanol and SUCC for succinate.

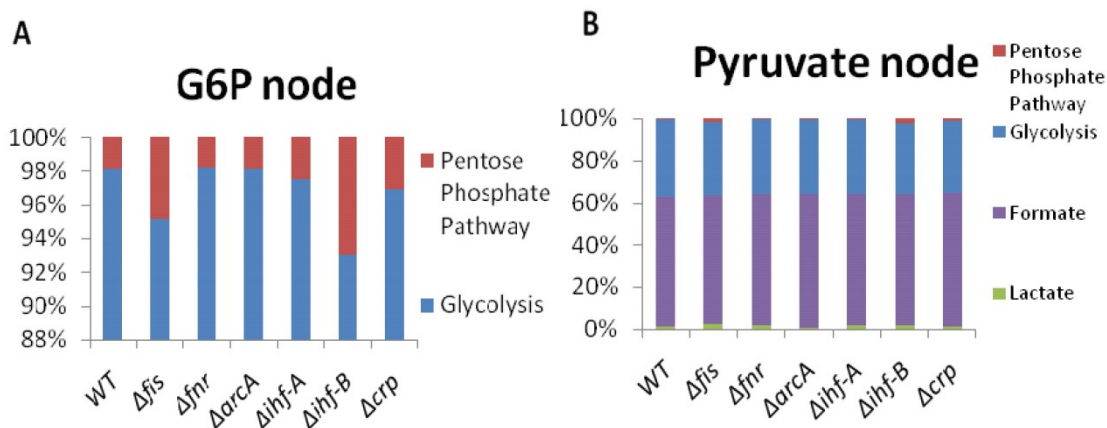

**Figure S6: (A) Distribution of fluxes at G6P node in WT and six global transcription factor deletion mutants. A variation of maximum 4 % is noted, indicating the robustness of this node. (B) Distribution of fluxes at pyruvate node. The major part of the fluxes through this node is channeled towards glycolysis and formate production and the various was subtly different.**

The distribution of carbon fluxes on these nodes is similar for all the strains, indicating the robustness of these strains and also indicating that the deletion of global transcription factors may not affect the distribution of fluxes. Rather, deletion can affect the absolute fluxes of the metabolites.

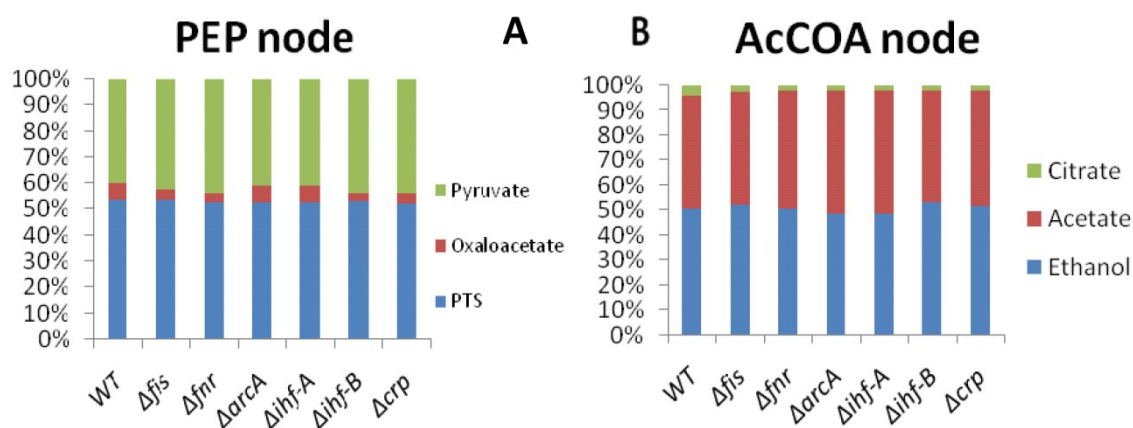

**Figure S7: (A) Distribution of fluxes at PEP node in WT and six global transcription factor deletion mutants. The major carbon flux at this node is directed towards pyruvate and PTS branches (B) Distribution of fluxes at AcCoA node. The major part of the fluxes through this node is channeled towards acetate and ethanol production.**

The distribution of carbon fluxes on these nodes is similar for all the strains, indicating the robustness of these strains and also indicating that the deletion of global transcription factors may not affect the distribution of fluxes. Rather, deletion can affect the absolute fluxes of the metabolites.

### Regulation of Central carbon Metabolism genes by transcription factors under study

| Global regulators | Genes                                                                                                                                                                                                                                                                                                                                                                                                                                                                                                     |                                                                                                                                                                                                                                                                                                                                                                                                                                                                                    |
|-------------------|-----------------------------------------------------------------------------------------------------------------------------------------------------------------------------------------------------------------------------------------------------------------------------------------------------------------------------------------------------------------------------------------------------------------------------------------------------------------------------------------------------------|------------------------------------------------------------------------------------------------------------------------------------------------------------------------------------------------------------------------------------------------------------------------------------------------------------------------------------------------------------------------------------------------------------------------------------------------------------------------------------|
|                   | Positive influence                                                                                                                                                                                                                                                                                                                                                                                                                                                                                        | Negative influence                                                                                                                                                                                                                                                                                                                                                                                                                                                                 |
| CRP               | <i>ptsG</i> <sup>2</sup> , <i>ptsH</i> <sup>8</sup> , <i>gltA</i> <sup>1</sup> , <i>acnA</i> <sup>1</sup> , <i>acnB</i> , <i>icdA</i> <sup>1</sup> , <i>sdhCDAB</i> <sup>1</sup> , <i>cyo</i> <sup>9</sup> , <i>fumAC</i> , <i>acs</i> <sup>9</sup> , <i>gap</i> <sup>9</sup> , <i>aceEF</i> <sup>9</sup> , <i>pdhR</i> <sup>9</sup> , <i>lpdA</i> , <i>fumB</i> , <i>cyo</i> , <i>pdhR</i> , <i>ackA</i> <sup>10</sup> , <i>fba</i> <sup>11</sup> , <i>gapA</i> <sup>11</sup> , <i>pgk</i> <sup>11</sup> | <i>cya</i> , <i>fis</i> , <i>aceBA</i> <sup>9</sup> , <i>crp-cAMP</i> <sup>15</sup>                                                                                                                                                                                                                                                                                                                                                                                                |
| Fis               | <i>ptsG</i> , <i>adhE</i> , <i>hyaA-F</i> <sup>9</sup> , <i>nuoA-N</i> , <i>ndh</i> , <i>lpd</i> <sup>15</sup>                                                                                                                                                                                                                                                                                                                                                                                            | <i>ptsG</i> , <i>fis</i> , <i>crp</i> <sup>6</sup> , (cAMP) <i>cya</i> <sup>6</sup> , <i>acnB</i> <sup>9</sup> , <i>acs</i> <sup>9</sup> , <i>fumB</i> , <i>aldB</i> , <i>pflB</i> <sup>15</sup>                                                                                                                                                                                                                                                                                   |
| FNR               | <i>foc-pflB</i> <sup>2</sup> , <i>frd</i> <sup>2</sup> , <i>arcA</i> <sup>2</sup> , <i>adhE</i> <sup>12</sup> , <i>yfiD</i> <sup>3</sup> , <i>fumB</i> <sup>3</sup> , <i>aspA</i> <sup>3</sup> , <i>pykA</i> <sup>3</sup>                                                                                                                                                                                                                                                                                 | <i>cyd</i> <sup>2</sup> , <i>cyoAE</i> <sup>2,12</sup> , <i>gltA</i> <sup>1</sup> , <i>acnA</i> <sup>1</sup> , <i>icdA</i> <sup>1</sup> , <i>fumAC</i> <sup>1,12</sup> , <i>ndh</i> <sup>5</sup> , <i>nuoE</i> <sup>5</sup> , <i>aceBA</i> <sup>9</sup> , <i>sucABCD</i> <sup>12</sup> , <i>sdhCDAB</i> <sup>12</sup> , <i>yfiD</i> <sup>12</sup>                                                                                                                                  |
| ArcA              | <i>focA-pflB</i> <sup>2</sup> , <i>cyd</i> <sup>2</sup> , <i>frd</i> <sup>4</sup> , <i>hyaA-F</i> <sup>9</sup> , <i>fumB</i> , <i>hyaA-1</i> <sup>12</sup> , <i>yfiD</i> <sup>12</sup> , <i>appBC</i> <sup>12</sup> ,                                                                                                                                                                                                                                                                                     | <i>fnr</i> , <i>ptsG</i> , <i>cyo</i> <sup>2</sup> , <i>pdh</i> <sup>2</sup> , <i>gltA</i> <sup>2</sup> , <i>acnAB</i> <sup>2,12</sup> , <i>icdA</i> <sup>2</sup> , <i>sucABCD</i> <sup>2</sup> , <i>sdhCDAB</i> <sup>2,14</sup> , <i>fumA</i> <sup>2</sup> , <i>mdh</i> <sup>2</sup> , <i>aceBAKEF</i> <sup>1</sup> , <i>aceEF-lpd</i> <sup>1,14</sup> , <i>pykA</i> <sup>3</sup> , <i>ldh</i> , <i>acs</i> <sup>9</sup> , <i>glcDEFG</i> <sup>9</sup> , <i>ndh</i> <sup>12</sup> |
| IHF               | <i>fis</i> , <i>fnr</i> , <i>aceBAK</i> <sup>9</sup> , <i>glcDEFG</i> <sup>9</sup> , <i>hycA-I</i> <sup>9</sup> , <i>gltA</i> , <i>focA-pflB</i> <sup>15</sup>                                                                                                                                                                                                                                                                                                                                            | <i>pta</i> <sup>7</sup> , <i>ack</i> <sup>7</sup> , <i>sucABCD</i> <sup>9</sup> , <i>ndh</i> , <i>nuoA</i> , <i>sucABCD</i> <sup>15</sup>                                                                                                                                                                                                                                                                                                                                          |

**Table S1: This table gives an account of central carbon metabolism genes induced and repressed by global transcription factors studied.**

| Stoichiometry                                                                                                                                                                                                                                                                                                                                                                                                                                                                                                                                                                                                                                                                                                    | Reactions    |
|------------------------------------------------------------------------------------------------------------------------------------------------------------------------------------------------------------------------------------------------------------------------------------------------------------------------------------------------------------------------------------------------------------------------------------------------------------------------------------------------------------------------------------------------------------------------------------------------------------------------------------------------------------------------------------------------------------------|--------------|
| 0.14176 Glyc3P + 26.2949 ATP + 0.60097 Ala + 0.10124 Cys + 0.26647 Asp +<br>0.30747 Glu + 0.2048 Phe + 0.67725 Gly + 0.10473 His + 0.32116 Ile +<br>0.37935 Lys + 0.49804 Leu + 0.16989 Met + 0.26647 Asn + 0.24436<br>Pro + 0.29091 Gln + 0.32698 Arg + 0.38031 Ser + 0.28044 Thr +<br>0.46778 Val + 0.062835 Trp + 0.15244 Tyr + 0.1489 rATP + 0.18319<br>rGTP + 0.11366 rCTP + 0.12273 rUTP + 0.023904 dATP + 0.024582<br>dGTP + 0.024582 dCTP + 0.023904 dTTP + 0.28352 avg_FS +<br>0.0069264 UDPGlc + 0.010368 CDPEth + 0.010368 OH_myr_ac +<br>0.010368 C14_0_FS + 0.010368 CMP_KDO + 0.010368 NDPHep +<br>0.0069264 TDPGlc + 0.01656 UDP_NAG + 0.01656 UDP_NAM +<br>0.01656 di_am_pim + 0.0924 ADPGlc ==> | mue          |
| ==> O2                                                                                                                                                                                                                                                                                                                                                                                                                                                                                                                                                                                                                                                                                                           | O2_up        |
| ==> N                                                                                                                                                                                                                                                                                                                                                                                                                                                                                                                                                                                                                                                                                                            | N_up         |
| CO2 <=>                                                                                                                                                                                                                                                                                                                                                                                                                                                                                                                                                                                                                                                                                                          | CO2_ex       |
| 4 ATP + 4 NADPH ==> S                                                                                                                                                                                                                                                                                                                                                                                                                                                                                                                                                                                                                                                                                            | S_up         |
| PEP ==> G6P + Pyr                                                                                                                                                                                                                                                                                                                                                                                                                                                                                                                                                                                                                                                                                                | Glc_PTS_up   |
| ATP ==> G6P                                                                                                                                                                                                                                                                                                                                                                                                                                                                                                                                                                                                                                                                                                      | Glc_ATP_up   |
| Succ ==>                                                                                                                                                                                                                                                                                                                                                                                                                                                                                                                                                                                                                                                                                                         | Succ_ex      |
| ==> Glyc                                                                                                                                                                                                                                                                                                                                                                                                                                                                                                                                                                                                                                                                                                         | Glyc_up      |
| ATP + Glyc ==> Glyc3P                                                                                                                                                                                                                                                                                                                                                                                                                                                                                                                                                                                                                                                                                            | Glyc::Glyc3P |
| DHAP + NADH <=> Glyc3P                                                                                                                                                                                                                                                                                                                                                                                                                                                                                                                                                                                                                                                                                           | DHAP::Glyc3P |
| Lac ==>                                                                                                                                                                                                                                                                                                                                                                                                                                                                                                                                                                                                                                                                                                          | Lac_ex       |
| Eth ==>                                                                                                                                                                                                                                                                                                                                                                                                                                                                                                                                                                                                                                                                                                          | Eth_ex       |
| Ac ==>                                                                                                                                                                                                                                                                                                                                                                                                                                                                                                                                                                                                                                                                                                           | Ac_ex        |
| ==> Glucn                                                                                                                                                                                                                                                                                                                                                                                                                                                                                                                                                                                                                                                                                                        | Glucn_up     |
| Form ==>                                                                                                                                                                                                                                                                                                                                                                                                                                                                                                                                                                                                                                                                                                         | Form_ex      |
| G6P <=> F6P                                                                                                                                                                                                                                                                                                                                                                                                                                                                                                                                                                                                                                                                                                      | G6P::F6P     |
| F16P ==> F6P                                                                                                                                                                                                                                                                                                                                                                                                                                                                                                                                                                                                                                                                                                     | F16P::F6P    |
| F6P + ATP ==> F16P                                                                                                                                                                                                                                                                                                                                                                                                                                                                                                                                                                                                                                                                                               | F6P::F16P    |
| F16P <=> DHAP + G3P                                                                                                                                                                                                                                                                                                                                                                                                                                                                                                                                                                                                                                                                                              | F16P::T3P    |
| DHAP <=> G3P                                                                                                                                                                                                                                                                                                                                                                                                                                                                                                                                                                                                                                                                                                     | DHAP::G3P    |
| G3P <=> DPG + NADH                                                                                                                                                                                                                                                                                                                                                                                                                                                                                                                                                                                                                                                                                               | G3P::DPG     |
| DPG <=> 3PG + ATP                                                                                                                                                                                                                                                                                                                                                                                                                                                                                                                                                                                                                                                                                                | DPG::3PG     |



|                              |                    |
|------------------------------|--------------------|
| 3PG <==> 2PG                 | 3PG::2PG           |
| 2PG <==> PEP                 | 2PG::PEP           |
| PEP ==> Pyr + ATP            | PEP::PYR           |
| Pyr + 2 ATP ==> PEP          | Pyr::PEP           |
| Pyr ==> AcCoA + NADH + CO2   | PYR::AcCoA         |
| AcCoA + OxA ==> Cit          | AcCoA::Cit         |
| Cit <==> ICit                | Cit::ICit          |
| ICit <==> aKG + NADPH + CO2  | ICit::aKG          |
| aKG ==> SuccCoA + NADH + CO2 | aKG::SuccCoA       |
| SuccCoA <==> Succ + ATP      | SuccCoA::Succ      |
| Succ ==> Fum + QuiH2         | Succ::Fum          |
| Fum + QuiH2 ==> Succ         | Fum::Succ          |
| Fum <==> Mal                 | Fum::Mal           |
| Mal <==> OxA + NADH          | Mal::OxA           |
| ICit ==> Succ + Glyox        | ICit::Glyox        |
| AcCoA + Glyox ==> Mal        | Glyox::Mal         |
| G6P <==> PGlac + NADPH       | G6P::PGlac         |
| AcCoA + NADH <==> Adh        | AcCoA::Adh         |
| NADH + Adh <==> Eth          | Adh::Eth           |
| PGlac ==> PGluc              | PGlac::PGluc       |
| Glucn + ATP ==> PGluc        | Glucn::PGluc       |
| PGluc ==> RI5P + NADPH + CO2 | PGluc::RI5P        |
| RI5P <==> X5P                | RI5P::X5P          |
| RI5P <==> R5P                | RI5P::R5P          |
| R5P + X5P <==> G3P + S7P     | Transket1          |
| G3P + S7P <==> F6P + E4P     | Transaldo          |
| E4P + X5P <==> F6P + G3P     | Transket2          |
| PGluc ==> KetoPGluc          | PGluc::KetoPGluc   |
| KetoPGluc <==> G3P + Pyr     | KetoPGluc::G3P_Pyr |
| OxA + ATP ==> PEP + CO2      | OxA::PEP           |
| PEP + CO2 ==> OxA            | PEP::OxA           |
| AcCoA <==> AcP               | AcCoA::AcP         |

|                                                                                       |             |
|---------------------------------------------------------------------------------------|-------------|
| AcP <==> ATP + Ac                                                                     | AcP::Ac     |
| Pyr ==> AcCoA + Form                                                                  | Pyr::Form   |
| Pyr + NADH <==> Lac                                                                   | Pyr::Lac    |
| NADH <==> QuiH2 + 2 H_ex                                                              | NADHDehydro |
| QuiH2 + 0.5 O2 ==> 2 H_ex                                                             | Oxidase     |
| NADH + H_ex <==> NADPH                                                                | TransHydro  |
| 3 H_ex <==> ATP                                                                       | ATPSynth    |
| ATP ==>                                                                               | ATPdrain    |
| 2 PEP + E4P + ATP + NADPH ==> Chor                                                    | Chor_Synth  |
| R5P + 2 ATP ==> PRPP                                                                  | PRPP_Synth  |
| ATP + NADPH <==> MTHF                                                                 | MTHF_Synth  |
| Pyr + Glu ==> aKG + Ala                                                               | Ala_Synth   |
| 2 Pyr + NADPH + Glu ==> aKG + CO2 + Val                                               | Val_Synth   |
| 2 Pyr + AcCoA + NADPH + Glu ==> aKG + NADH + 2 CO2 + Leu                              | Leu_Synth   |
| 2 ATP + N + Asp ==> Asn                                                               | Asn_Synth   |
| OxA + Glu ==> aKG + Asp                                                               | Asp_synth   |
| di_am_pim ==> CO2 + Lys                                                               | Lys_Synth   |
| SuccCoA + ATP + 2 NADPH + MTHF + Cys + Asp ==> Pyr + Succ + N + Met                   | Met_Synth   |
| 2 ATP + 2 NADPH + Asp ==> Thr                                                         | Thr_Synth   |
| Pyr + NADPH + Glu + Thr ==> aKG + CO2 + N + Ile                                       | Ile_Synth   |
| ATP + PRPP + Gln ==> aKG + 2 NADH + His                                               | His_Synth   |
| aKG + NADPH + N ==> Glu                                                               | Glu_synth   |
| ATP + N + Glu ==> Gln                                                                 | Gln_Synth   |
| ATP + 2 NADPH + Glu ==> Pro                                                           | Pro_Synth   |
| AcCoA + 4 ATP + NADPH + CO2 + N + Asp + 2 Glu ==> aKG + Fum + Ac + Arg                | Arg_Synth   |
| Chor + PRPP + Gln + Ser ==> G3P + Pyr + CO2 + Glu + Trp                               | Trp_Synth   |
| Chor + Glu ==> aKG + NADH + CO2 + Tyr                                                 | Tyr_Synth   |
| Chor + Glu ==> aKG + CO2 + Phe                                                        | Phe_Synth   |
| 3PG + Glu ==> aKG + NADH + Ser                                                        | Ser_Synth   |
| Ser ==> MTHF + Gly                                                                    | Gly_Synth   |
| AcCoA + S + Ser ==> Ac + Cys                                                          | Cys_Synth   |
| 5 ATP + CO2 + PRPP + 2 MTHF + 2 Asp + Gly + 2 Gln ==> 2 Fum + NADPH + 2<br>Glu + rATP | rATP_Synth  |

|                                                                                                        |                 |
|--------------------------------------------------------------------------------------------------------|-----------------|
| 6 ATP + CO <sub>2</sub> + PRPP + 2 MTHF + Asp + Gly + 3 Gln ==> 2 Fum + NADH + NADPH<br>+ 3 Glu + rGTP | rGTP_Synth      |
| ATP + Gln + rUTP ==> Glu + rCTP                                                                        | rCTP_Synth      |
| 4 ATP + N + PRPP + Asp ==> NADH + rUTP                                                                 | rUTP_Synth      |
| NADPH + rATP ==> dATP                                                                                  | dATP_Synth      |
| NADPH + rGTP ==> dGTP                                                                                  | dGTP_Synth      |
| NADPH + rCTP ==> dCTP                                                                                  | dCTP_Synth      |
| 2 NADPH + MTHF + rUTP ==> dTTP                                                                         | dTTP_Synth      |
| 8.24 AcCoA + 7.24 ATP + 13.91 NADPH ==> avg_FS                                                         | avg_FS_Synth    |
| G6P + ATP ==> UDPGlc                                                                                   | UDPGlc_Synth    |
| 3PG + 3 ATP + NADPH + N ==> NADH + CDPeth                                                              | CDPEth_Synth    |
| 7 AcCoA + 6 ATP + 11 NADPH ==> OH_myr_ac                                                               | OH_myr_ac_Synth |
| 7 AcCoA + 6 ATP + 12 NADPH ==> C14_0_FS                                                                | C14_0_FS_Synth  |
| PEP + R5P + 2 ATP ==> CMP_KDO                                                                          | CMP_KDO_Synth   |
| 1.5 G6P + ATP ==> 4 NADPH + NDPHep                                                                     | NDPHep_Synth    |
| F6P + 2 ATP + N ==> TDPGlc                                                                             | TDPGlc_Synth    |
| F6P + AcCoA + ATP + Gln ==> Glu + UDP_NAG                                                              | UDP_NAG_Synth   |
| PEP + NADPH + UDP_NAG ==> UDP_NAM                                                                      | UDP_NAM_Synth   |
| Pyr + SuccCoA + ATP + 2 NADPH + Asp + Glu ==> alKG + Succ + di_am_pim                                  | di_am_pim_Synth |
| G6P + ATP ==> ADPGlc                                                                                   | ADPGlc_Synth    |

**Table S2: This table gives an account of reactions used in flux balance analysis (adopted from Klamt *et al.*)<sup>30</sup>**

**Accumulation rates of metabolites in mid exponential phase**

| <b>Rates(mM/(g(dcw)*h)</b> | <b>Acetate</b> | <b>Formate</b> | <b>Lactate</b> | <b>Succinate</b> | <b>Ethanol</b> | <b>Glucose</b> |
|----------------------------|----------------|----------------|----------------|------------------|----------------|----------------|
| <b>WT</b>                  | 11.91±0.09     | 26.25±0.25     | 0.5±0          | 1.18±0.06        | 13±0           | 16.95±0.05     |
| <b>Δfis</b>                | 15±0           | 32±0           | 0.91±0.5       | 0.3±0            | 15.7±0         | 20±0           |
| <b>Δfnr</b>                | 15.99±0.01     | 34.25±0.25     | 1.05±0         | 0.23±0           | 16.67±0.67     | 20.43±0.78     |
| <b>ΔarcA</b>               | 14.4±0.3       | 30.5±0.5       | 0.5±0          | 1.42±0.37        | 14.3±0.09      | 17.4±0.4       |
| <b>Δihf-A</b>              | 10±0           | 21±0           | 0.7±0          | 1.01±0           | 7.22±0.02      | 12.25±0.25     |
| <b>Δihf-B</b>              | 5.7±0.3        | 12.5±0.5       | 0.44±0.01      | 0.13±0.02        | 7.4±0.6        | 7.5±0          |
| <b>Δcrp</b>                | 7.6±0.1        | 14.78±0.22     | 0.18±0.04      | 0.36±0.01        | 9.88±0.12      | 10.25±0.25     |

**Table S3: Accumulation rates of various metabolite production and glucose consumption in mid exponential phase for WT and six global transcription deletion mutants. The above rates were used for flux balance analysis for each strain. The analysis indicated that carbon channeling through different metabolic fluxes is subtly regulated by transcription factors through metabolic enzymes. Note that, all the rates are represented as mM/(g(dcw)\*h).**

## References

1. A. Perrenoud and U. Sauer, *J Bacteriol*, 2005, **187**, 3171-3179.
2. K.Shimizu, *ISRN Biochem*, 2013, 1–47 .
3. S. S. Levanon, K. Y. San and G. N. Bennett, *Biotechnol Bioeng*, 2005, **89**, 556–564 .
4. G. Cecchini, I.Schroder, R. P. Gunsalus and E. Maklashina, *Biochim Biophys Acta* , 2002,**1553**, 140–157 .
5. K.A. Salmon, S.P. Hung, N.R. Steffen, R. Krupp, P. Baldi, G.W. Hatfield, and R.P. Gunsalus, *J Biol Chem*, 2005, **280**, 15084-15096.
6. D.Ropers, H. de Jong, M.Page, D. Schneider and J. Geiselmann, *BioSystems* , 2006, **84**, 124–152 .
7. T. Bykowski and A. Sirko, *Biochimie* , 1998, **80**, 987–1001.
8. T. Shimada, N. Fujita, K. Yamamoto and A. Ishihama, *PLoS One*, 2011, **6**.
9. M.D Rolfe, A. Ter Beek, A.I.Graham, E.W. Trotter, H.S. Asif, G. Sanguinetti, J.T. de Mattos, R.K. Poole, and J. Green , *J Biol Chem*, 2011, **286**, 10147–10154.
10. G. Gosset, Z. Zhang, S. Nayyar, W. A. Cuevas and M. H. Saier, *J Bacteriol*, 2004, **186**, 3516–3524.
11. V. Baldazzi, D. Ropers, Y. Markowicz, D. Kahn, J. Geiselmann and H.De Jong, *PLoS Comput Biol*, 2010, **6**, 1000812.
12. E. W. Trotter *et al.*,*PLoS One* 2011,**6**, 1–7.
13. S.Steinsiek, S. Stagge and K. Bettenbrock, *PLoS One* ,2014, **9**.
14. S. Federowicz *et al.*, *PLoS Genet*. 2014, **10**.
15. I. M. Keseler, J. Collado-Vides, S. Gama-Castro, J. Ingraham, S. Paley, I. T. Paulsen, M. Peralta-Gil and P. D. Karp, *Nucleic Acids Res*, 2005, **33**, 334-337.
